# Supplementary material for: Thermal and light irradiation effects on the electrocatalytic performance of hemoglobin modified Co3O4-g-C3N4 nanomaterials for the oxygen evolution reaction
Source: Royal Society of Chemistry journal article supplement (doi:10.1039/d0nr00818d), 2020-01-01
Supplement: d0nr00818d1.pdf [file d0nr00818d1.pdf]

**Thermal and light irradiation effect on the electrocatalytic performance  
of hemoglobin modified Co<sub>3</sub>O<sub>4</sub>-g-C<sub>3</sub>N<sub>4</sub> nanomaterials for oxygen  
evolution reaction**

*Carlos Leal-Rodríguez,<sup>†a</sup> Daily Rodríguez-Padrón,<sup>†a</sup> Zeid A. Alothman,<sup>\*b</sup> Manuel Cano,<sup>\*c</sup>  
Juan J. Giner-Casares,<sup>c</sup> Mario J. Muñoz-Batista,<sup>\*d</sup> Sameh M. Osman<sup>b</sup>, and Rafael  
Luque<sup>a,b</sup>*

<sup>a</sup>Departamento de Química Orgánica, Universidad de Córdoba, Campus de Rabanales, Edificio Marie Curie (C-3), Ctra Nnal IV-A, Km 396, E14014, Cordoba, Spain.

<sup>b</sup>Department of Chemistry, College of Science, King Saud University, P.O. Box 2455, Riyadh, 11451, Saudi Arabia

<sup>c</sup>Departamento de Química Física y Termodinámica Aplicada, Instituto Universitario de Nanoquímica (IUNAN), Universidad de Córdoba, Campus de Rabanales, Ed. Marie Curie, E-14071 Córdoba, Spain.

<sup>d</sup>Department of Chemical Engineering, Faculty of Sciences, University of Granada. Avda. Fuentenueva, s/n 18071, Granada, Spain.

<sup>†</sup> These authors contribute equally to the work.

\*Correspondence: M.C. [g82calum@uco.es](mailto:g82calum@uco.es), M.J.M-B. [mariomunoz@ugr.es](mailto:mariomunoz@ugr.es), R.L. [rafael.luque@uco.es](mailto:rafael.luque@uco.es), Z.A.A. [zaothman@ksu.edu.sa](mailto:zaothman@ksu.edu.sa)

### Synthesis of Ruthenium Oxide Nanoparticles (RuO<sub>2</sub> NPs) by precipitation method.<sup>S1,S2</sup>

RuO<sub>2</sub> NPs were synthesized according to the protocol described previously with slight modifications. Briefly, 0.28 g of RuCl<sub>3</sub>·H<sub>2</sub>O were dissolved into 15 mL of ultrapure water and, subsequently, 2 mL of propionic acid was added as pro-surfactant. Then, under vigorous stirring, 15 mL of NaOH 1.5 M were added dropwise to the mixture, increasing the pH up to 9. Next, the resulting reaction mixture was heated at 80 °C for 1 h. After that, the formed product was separated by centrifugation at 7500 rpm for 20 min. The resulting pellet was suspended in ultrapure water (or ethanol) and then centrifuged again. This purification process was repeated at least 3 times. After that, the purified pellet was dried overnight at 60 °C and lastly calcinated at 900 °C for 4 hours.

X-Ray Diffraction (XRD) measurements confirmed the successful synthesis of RuO<sub>2</sub> NPs (Fig. S1), showing the characteristic XRD pattern for this type of electrocatalyst material (observed plane diffractions: 110, 101, 200, 211, 220, 002, 310, 112, 301).<sup>S1,S3</sup>

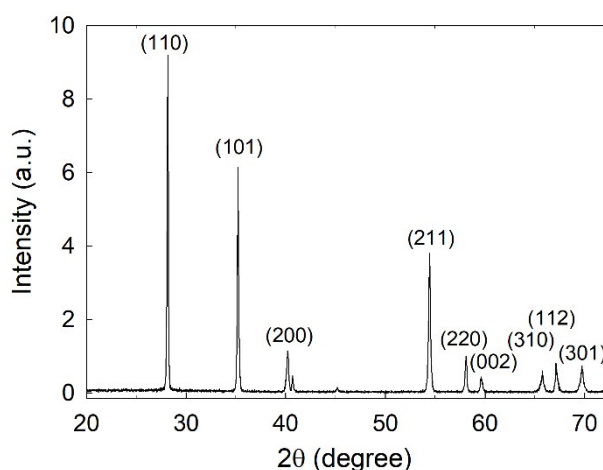

**Fig. S1** XRD pattern of the resulting RuO<sub>2</sub> NPs, indicating the characteristic Miller indices (JCPDS Card Number 21-1172) with a main diffraction peak at 28° of the (110) plane.

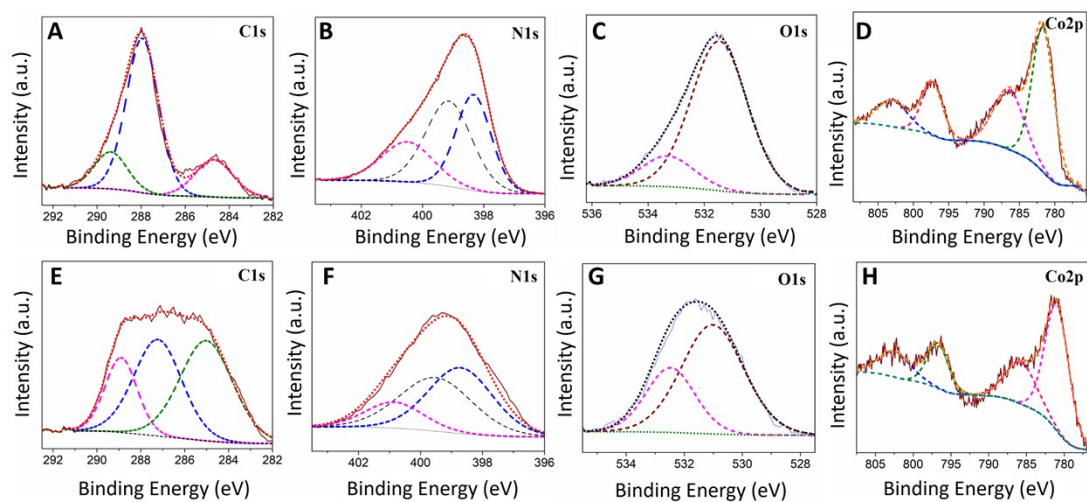

**Fig. S2** XPS spectra of (A-D) 10%Co/g-C<sub>3</sub>N<sub>4</sub> and (E-H) 10%Co/g-C<sub>3</sub>N<sub>4</sub>-Hb samples.

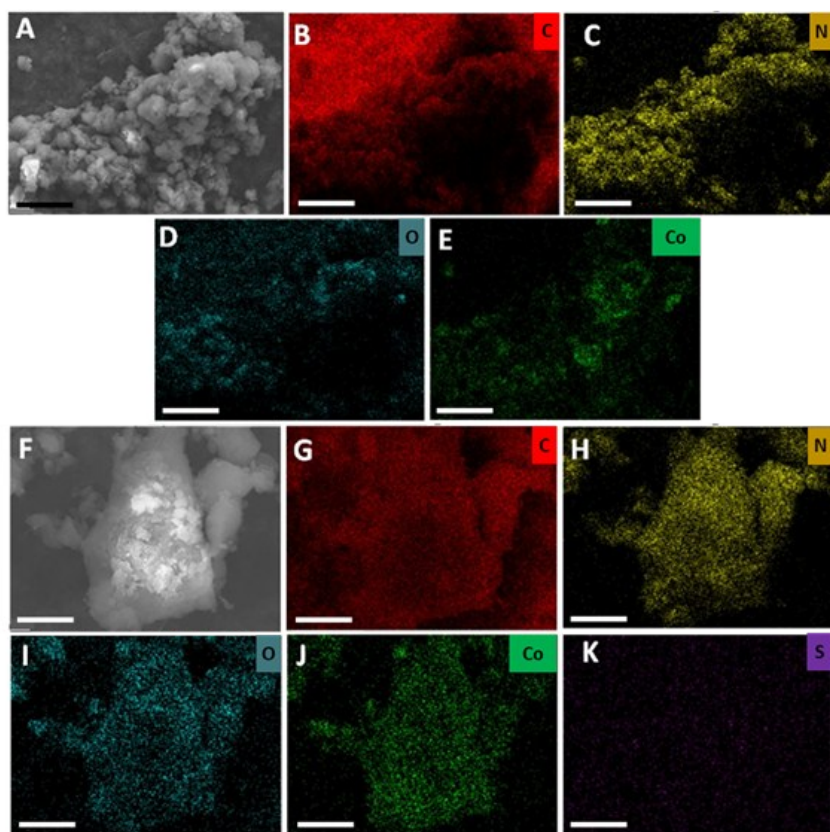

**Fig. S3** SEM-mapping images of (A-E) 10%Co/g-C<sub>3</sub>N<sub>4</sub> and (F-K) 10%Co/g-C<sub>3</sub>N<sub>4</sub>-Hb samples. Scale bar: 500 nm.

### Determining the number of active sites by Cyclic Voltammetry.<sup>S4,S5</sup>

A sequence of cyclic voltammeteries (CVs) were performed in a narrow potential window of -0.717 to -0.817 vs RHE (i.e. where no faradaic reactions occurred) at different scan rates (12-48  $\text{mV}\cdot\text{s}^{-1}$  at an interval of 4  $\text{mV}\cdot\text{s}^{-1}$ ). Sequentially, the slope (i.e. areal capacitance) of the lines obtained through the plotting of the  $J_{\text{anodic}}-J_{\text{cathodic}}$  (at -0.767 V vs RHE) against the scan rate was used to determine the number of active sites as well as the electrochemical surface area of each sample.

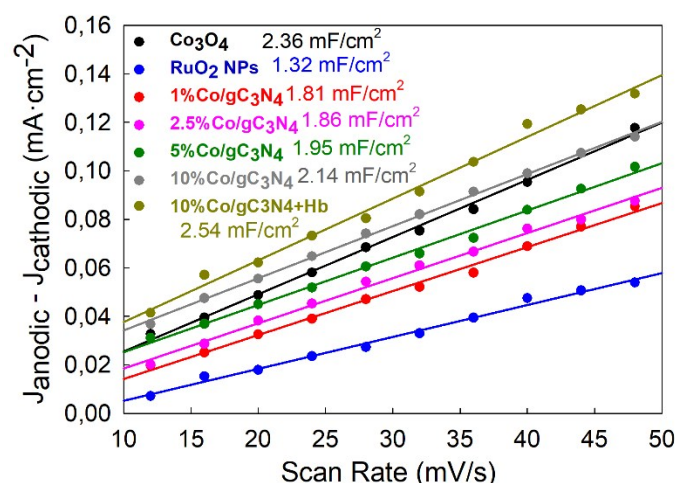

**Fig. S4** Plots of the resulting anodic and cathodic current densities against the scan rate for the more representative samples that is proportional to the number of active sites.

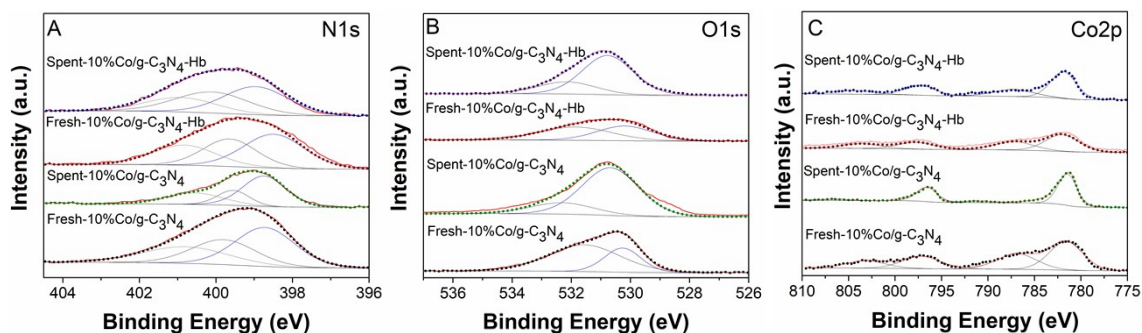

**Fig. S5** XPS spectra of 10%Co/g- $\text{C}_3\text{N}_4$  and 10%Co/g- $\text{C}_3\text{N}_4$ -Hb based electrodes before and after the reaction.

### References

- S1 M. Khorasani-Motlagh, M. Noroozifar, M. Yousefi, *Int. J. Nanosci. Nanotechnol.* 2011, **7**, 167-172.
- S2 T. P. Tsele, A. S. Adekunle, O. E. Fayemi, E. E. Ebenso, *Electrochimica Acta* 2017, **243**, 331-348.
- S3 E. A. Paoli, F. Masini, R. Frydendal, D. Deiana, C. Schlaup, M. Malizia, T. W. Hansen, S. Horch, I. E. L. Stephens, I. Chorkendorff, *Chem. Sci.*, 2015, **6**, 190-196.
- S4 M. B. Stevens, L. J. Enman, A. S. Batchellor, M. R. Cosby, A. E. Vise, C. D. M. Trang, S. W. Boettcher, *Chem. Mater.*, 2017, **29**, 120-140.

S5 T. Kou, S. Wang, J. L. Hauser, M. Chen, S. R. J. Oliver, Y. Ye, J. Guo, Y. Li, *ACS Energy Lett.*, 2019, **4**, 622-628.
